# Supplementary material
Source: publisher figshare collection journal article supplement (https://acs.figshare.com/ndownloader/files/14342489)
Supplement: Supplementary file 1 [file 14342489]

# Supporting Information

## Measurement and Correlation of Solubility of Tetramethylpyrazine in Nine Mono-Solvents and Two Binary Solvent Systems

*Nuoyang Zhang*<sup>a,b,c</sup>, *Si Li*<sup>a,b,c</sup>, *Haiyan Yang*<sup>a,b,c</sup>, *Mengya Li*<sup>a,b,c</sup>, *Yang Yang*<sup>a,b,c</sup>,

*Weiwei Tang*<sup>a,b,c,\*</sup>

<sup>a</sup> School of Chemical Engineering and Technology, State Key Laboratory of Chemical Engineering, Tianjin University, Tianjin 300072, China

<sup>b</sup> Collaborative Innovation Center of Chemistry Science and Engineering, Tianjin 300072, China

<sup>c</sup> Key Laboratory Modern drug Delivery and High Efficiency in Tianjin University, Tianjin, China

### Corresponding Author

\*Tel.: +86-22-27405754

Fax: +86-22-27374971

E-mail: [wwtang@tju.edu.cn](mailto:wwtang@tju.edu.cn)

For method verification, the solubility of benzoic acid in ethanol, isopropyl alcohol and acetone at  $T = (288.15 \text{ to } 298.15) \text{ K}$  were re-measured by UV-Vis spectroscopy in this study at atmospheric pressure and compared with those data determined by the gravimetric method in the literature<sup>1</sup>.

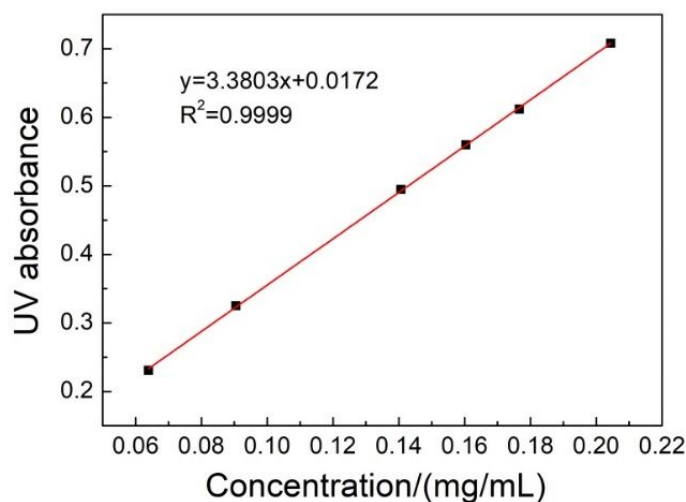

**Fig.S1.** Typical standard curve of absorbance *versus* solution concentration ( $\text{mg} \cdot \text{mL}^{-1}$ ) of benzoic acid for concentration determination at 283nm by UV-Vis spectroscopy

**Table S1.** Experimental mole fraction solubility ( $x^{\text{exp}}$ ) of benzoic acid determined by UV-Vis spectroscopy in this study and those reported mole fraction solubility ( $x^{\text{lit}}$ )<sup>1</sup> in ethanol, isopropyl alcohol and acetone at  $T = (288.15 \text{ to } 298.15) \text{ K}$  ( $P = 0.1 \text{ MPa}$ ).<sup>a</sup>

| solvent           | $x^{\text{exp}}$ | $x^{\text{lit}}$ | Deviation (%) |
|-------------------|------------------|------------------|---------------|
| T=288.15K         |                  |                  |               |
| ethanol           | 0.143            | 0.154            | 7.14          |
| isopropyl alcohol | 0.149            | 0.160            | 6.87          |
| acetone           | 0.149            | 0.159            | 6.29          |
| T=293.15K         |                  |                  |               |
| ethanol           | 0.153            | 0.165            | 7.27          |
| isopropyl alcohol | 0.168            | 0.174            | 3.45          |

|                   |       |       |      |
|-------------------|-------|-------|------|
| acetone           | 0.186 | 0.177 | 5.08 |
| T=298.15K         |       |       |      |
| ethanol           | 0.168 | 0.178 | 5.62 |
| isopropyl alcohol | 0.182 | 0.193 | 5.70 |
| acetone           | 0.208 | 0.197 | 5.58 |

<sup>a</sup> The standard uncertainty of  $T$  is  $u(T) = 0.1$  K. The relative standard uncertainty of the solubility is  $u_r(x) = 0.05$ . The relative uncertainty of pressure is  $u_r(P) = 0.05$ .

From the table, it is obvious that the deviation is no more than 7.27%, indicating the method used in this study is creditable and reliable. The deviation may be caused by the instrumental error, measurement methods and other errors. The instrumental error is determined by the instrumental accuracy. For example, the accuracy of an electric balance is  $\pm 0.0001$  g, the accuracy of a shaker is  $\pm 0.1$  K, all of these could bring about the instrument error. In addition, the measurement error may be resulted from experimental operations such as weighing and sampling.

## References:

1. Sandeepa, K.; Ravi Kumar, K.; Neeharika, T. S.; Satyavathi, B.; Thella, P. K. Solubility Measurement and Thermodynamic Modeling of Benzoic Acid in Monosolvents and Binary Mixtures. *J. Chem. Eng. Data* **2018**, 63, 2028–2037.
